# Supplementary material for: New insight into InSb-based thermoelectric materials: from a divorced eutectic design to a remarkably high thermoelectric performance
Source: Royal Society of Chemistry journal article supplement (doi:10.1039/c6ta10827j), 2017-01-01
Supplement: c6ta10827j2.pdf [file c6ta10827j2.pdf]

## Supplementary Material

### New Insight to InSb-based Thermoelectric Materials: From the Divorced Eutectic Design to Remarkable High Thermoelectric Performance

Yudong Cheng<sup>a</sup>, Junyou Yang<sup>a\*</sup>, Qinghui Jiang<sup>a\*</sup>, Dongsheng He<sup>b</sup>, Jiaqing He<sup>b</sup>, Yubo Luo<sup>a</sup>, Dan Zhang<sup>a</sup>, Zhiwei Zhou<sup>a</sup>, Yangyang Ren<sup>a</sup>, Jiwu Xin<sup>a</sup>

a. State Key Laboratory of Materials Processing and Die & Mould Technology  
Huazhong University of Science and Technology  
Wuhan 430074, P. R. China.

b. Shenzhen Key Laboratory of Thermoelectric Materials, Department of physics  
South University of Science and Technology of China  
Shenzhen 518055, P. R. China.

The thermal diffusivity was measured by the laser flash method with a Netzsch LFA-427 equipment. The figure below shows the time dependence of voltage signal of InSb<sub>1.04</sub> at four different

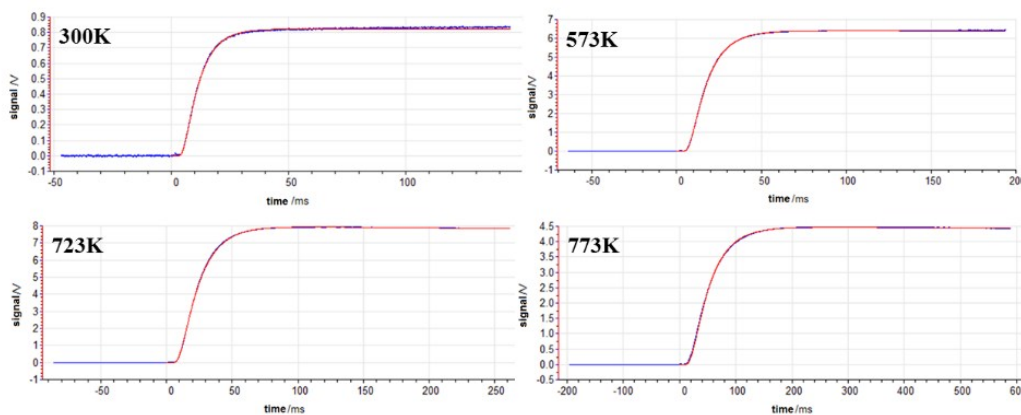

temperature during the measurement of thermal diffusion.

Fig.1 Time dependence of voltage signal.

We can see all V-T curves are similar and smooth, and cannot see any abnormal peaks. The stability of signal shows that the sample was under an equilibrium state and didn't have any phase transition during measurement.

| Sample Name          | Nominal Composition (at.%) |      | EDAX Composition (at.%) |       |
|----------------------|----------------------------|------|-------------------------|-------|
|                      | In                         | Sb   | In                      | Sb    |
| InSb                 | 50                         | 50   | 50.16                   | 49.84 |
| InSb <sub>1.01</sub> | 49.5                       | 50.5 | 49.27                   | 50.73 |
| InSb <sub>1.02</sub> | 49                         | 51   | 48.93                   | 51.07 |
| InSb <sub>1.03</sub> | 48.5                       | 51.5 | 48.58                   | 51.42 |
| InSb <sub>1.04</sub> | 48                         | 52   | 47.69                   | 52.31 |

Table.1 Nominal composition and compositions obtained by the EDAX tests.
